# Supplementary material
Source: Springer Nature journal article supplement (https://www.springermedizin.de/resource/supplementary/13075_2005_1878_MOESM7_ESM.pdf/9690790)
Supplement: MOESM7 [file 9690790]

**Additional file 7. Differentially expressed genes with function unknown or that cannot be included within a class.**

| Gene and biological function                                                                                                                                                                     | Symbol                       | GenBank   | Unigene | M     | LOR  |
|--------------------------------------------------------------------------------------------------------------------------------------------------------------------------------------------------|------------------------------|-----------|---------|-------|------|
| ↑(5) Gamma-glutamyl hydrolase (conjugase, foylpolymagglutamyl hydrolase)<br><i>Lysosome exopeptidase</i>                                                                                         | <b>GGH</b>                   | U55206    | 78619   | 2.03  | 8.41 |
| ↑(14) Hypothetical gene supported by AF131741<br><i>Unknown function</i>                                                                                                                         | <b>LOC441052</b>             | AF131741  | 535012  | 1.58  | 3.92 |
| ↑(16) Phosphoglycerate mutase 1 (brain)<br><i>Glycolysis</i>                                                                                                                                     | <b>PGAM1</b>                 | J04173    | 447492  | 1.55  | 4.33 |
| ↑(31) Zinc finger CCCH type domain containing 1<br><i>Unknown function</i>                                                                                                                       | <b>ZC3HDC1</b>               | AL13725   | 12646   | 1.30  | 2.43 |
| ↑(32) Microsomal glutathione S-transferase 3<br><i>Glutathione transferase activity</i>                                                                                                          | <b>MGST3</b>                 | AF026977  | 191734  | 1.30  | 2.93 |
| ↑(37) Hematological and neurological expressed 1<br><i>Haematopoietic cells and neurological development</i>                                                                                     | <b>HN1</b>                   | NM_016185 | 532803  | 1.27  | 2.59 |
| ↑(40) Chromosome 13 open reading frame 12 (C13orf12)<br><i>Unknown function</i>                                                                                                                  | <b>C13orf12</b>              | NM_015932 | 268742  | 1.25  | 2.49 |
| ↑(53) Adaptor-related protein complex 2, sigma 1 subunit<br><i>Clathrin cage assembly and endocytosis regulator</i>                                                                              | <b>AP2S1</b>                 | X97074    | 119591  | 1.17  | 2.00 |
| ↑ (60) ATPase, H <sup>+</sup> transporting, lysosomal 56/58kDa, V1 subunit B, isoform 2<br><i>ATPase-dependent proton transport</i>                                                              | <b>ATP6V1B2</b>              | L35249    | 295917  | 1.11  | 1.70 |
| ↑ (66) DKFZp564J157 protein<br><i>Unknown function</i>                                                                                                                                           | <b>DKFZp564J157</b>          | AL122042  | 426359  | 1.07  | 1.40 |
| ↑(68) Transmembrane protein 14C<br><i>Unknown function</i>                                                                                                                                       | <b>TMEM14C</b>               | AF151028  | 519557  | 1.06  | 1.38 |
| ↑ (75) EGF-containing fibulin-like extracellular matrix protein 1 (EFEMP1)<br><i>Repressed during capillary morphogenesis</i>                                                                    | <b>EFEMP1</b>                | U03877    | 76224   | 1.03  | 1.17 |
| ↑(77) Peroxisomal long-chain acyl-coA thioesterase<br><i>Acyl-CoA methabolism</i>                                                                                                                | <b>ZAP128</b>                | AK001939  | 446685  | 1.03  | 1.14 |
| ↑(80) Hypothetical protein LOC348262<br><i>Unknown function</i>                                                                                                                                  | <b>LOC348262</b>             | AK000852  | 514632  | 1.02  | 1.14 |
| ↑(81) ATP citrate lyase<br><i>Synthesis of cytosolic acetyl-CoA</i>                                                                                                                              | <b>ACLY</b>                  | X64330    | 387567  | 1.02  | 1.15 |
| ↑ (89) Esterase D/formylglutathione hydrolase<br><i>Unknown function</i>                                                                                                                         | <b>ESD</b>                   | AF112219  | 432491  | 0.98  | 0.78 |
| ↑ (104) Major vault protein<br><i>Drug resistance</i>                                                                                                                                            | <b>MVP</b>                   | X79882    | 513488  | 0.94  | 0.48 |
| ↑ (139) Hypothetical protein LOC116068<br><i>Cell wall catabolism</i>                                                                                                                            | <b>LOC116068</b>             | AL137315  | 136235  | 0,82  | 0,07 |
| ↑(140) Aminopeptidase puromycin sensitive<br><i>Zinc metallopeptidase possibly involved in proteolytic events regulating the cell cycle</i>                                                      | <b>NPEPPS</b>                | AJ132583  | 443837  | 0.81  | 0.03 |
| ↓ (4) Apolipoprotein B mRNA editing enzyme, catalytic polypeptide-like 3B<br>apolipoprotein B mRNA editing enzyme, catalytic polypeptide-like 3A<br><i>Control of cell cycle and cell growth</i> | <b>APOBEC3B<br/>APOBEC3A</b> | AL022318  | 226307  | -1.25 | 2.36 |
| ↓ (5) Sperm associated antigen 6                                                                                                                                                                 | <b>SPAG6</b>                 | AF079363  | 527698  | -1.23 | 2.47 |

|                                                                                                                                                                     |                  |           |        |       |      |
|---------------------------------------------------------------------------------------------------------------------------------------------------------------------|------------------|-----------|--------|-------|------|
| <i>Control of sperm flagellar motility and structural integrity</i>                                                                                                 |                  |           |        |       |      |
| <b>↓(11) Folate receptor 2 (fetal)</b><br><i>Member of the folate receptor (FOLR) family</i>                                                                        | <b>FOLR2</b>     | AF000380  | 433159 | -1.15 | 1.84 |
| <b>↓(22) Apolipoprotein A-I</b><br><i>High-density lipoprotein binding and lipoprotein metabolism</i>                                                               | <b>APOA1</b>     | X02162    | 93194  | -1.05 | 0.93 |
| <b>↓(24) Hypothetical gene supported by AL133018</b><br><i>Unknown function</i>                                                                                     | <b>LOC401018</b> | AL133018  | 534786 | -1.05 | 0.85 |
| <b>↓(28) Glycine N-methyltransferase</b><br><i>Regulation of methionine metabolism</i>                                                                              | <b>GNMT</b>      | X62250    | 144914 | -1.03 | 1.08 |
| <b>↓(29) Myotubularin related protein 8</b><br><i>Hydrolytic enzyme involved in phospholipids and protein amino acid dephosphorylation</i>                          | <b>MTMR8</b>     | AF073482  | 442892 | -1.02 | 0.82 |
| <b>↓(30) PTD013 protein/<br/>RWD domain containing 1</b><br><i>Unknown function</i>                                                                                 | <b>RWDD1</b>     | NM_016104 | 532164 | -1.02 | 1.01 |
| <b>↓(34) Hypothetical protein FLJ10769</b><br><i>Unknown function</i>                                                                                               | <b>FLJ10769</b>  | AK001631  | 408324 | -1.00 | 0.99 |
| <b>↓(40) Leucine-rich repeats and calponin homology (CH) domain containing 4</b><br><i>Putative receptor with unknown function</i>                                  | <b>LRCH4</b>     | AF053356  | 125742 | -0.94 | 0.72 |
| <b>↓(41) Cytochrome P450, family 2, subfamily C, polypeptide 18</b><br><i>Protein localized to the endoplasmic reticulum. Specific substrate not yet determined</i> | <b>CYP2C18</b>   | M61853    | 511872 | -0.94 | 0.16 |
| <b>↓(43) Hypothetical protein MGC11332</b><br><i>Tetracycline transport</i>                                                                                         | <b>MGC11332</b>  | U79290    | 98798  | -0.93 | 0.64 |
| <b>↓(46) Hypothetical protein FLJ11142</b><br><i>Unknown function</i>                                                                                               | <b>FLJ11142</b>  | AL133606  | 98704  | -0.91 | 0.51 |
| <b>↓(49) Putative lymphocyte G0/G1 switch gene</b><br><i>Unknown function</i>                                                                                       | <b>G0S2</b>      | M69199    | 432132 | -0.89 | 0.05 |
| <b>↓(52) Vitelliform macular dystrophy (Best disease, bestrophin)</b><br><i>Ion transport</i>                                                                       | <b>VMD2</b>      | AF057170  | 132319 | -0.87 | 0.33 |
| <b>↓(57) Spectrin repeat containing, nuclear envelope 1</b><br><i>Nuclear and Golgi complex organization</i>                                                        | <b>SYNE1</b>     | AL049548  | 12967  | -0.83 | 0.08 |
| <b>↓(59) Hypothetical protein MGC27085</b><br><i>Unknown function</i>                                                                                               | <b>MGC27085</b>  | BC028610  | 120277 | -0.82 | 0.06 |

M = differential expression ratio after dye-swap normalization; LOR=log odds ratio: all genes with LOR > 0 were considered significantly down-regulated (M<0) or up-regulated (M>0); in italics biological functions are reported; Each gene is univocally identifiable by a number ranging from 1 to 141 with an up-arrow meaning the up-regulation and from 1 to 58 with a down-arrow meaning the down-regulation in SSc-MVEC.
